# Supplementary material for: A simple dilute and shoot methodology for the identification and quantification of illegal insulin
Source: PubMed Central journal article supplement — J Pharm Anal. 2016 Apr 22;6(5):326–34. doi: 10.1016/j.jpha.2016.04.006 (PMC5762622; doi:10.1016/j.jpha.2016.04.006), 2016-04-22
Supplement: mmc2.pdf [file mmc2.pdf]

**Table A1.** The  $p$ -values of an unpaired 2-tailed t-student test used to study the potential matrix effects on the quantification of the different insulins.

|                   | Matrix 1 |      | Matrix 2 |      | Matrix 3 |      |
|-------------------|----------|------|----------|------|----------|------|
|                   | low      | high | low      | high | Low      | high |
| Insulin aspart    | 0.36     | 0.70 | 0.48     | 0.35 | 0.09     | 0.50 |
| Bovine insulin    | 0.28     | 0.34 | 0.12     | 0.09 | 0.10     | 0.28 |
| Insulin degludec  | 0.24     | 0.09 | 0.45     | 0.22 | 0.17     | 0.16 |
| Insulin detemir   | 0.27     | 0.13 | 0.12     | 0.32 | 0.24     | 0.29 |
| Insulin glargine  | 0.19     | 0.37 | 0.17     | 0.39 | 0.24     | 0.21 |
| Insulin glulisine | 0.13     | 0.09 | 0.26     | 0.09 | 0.13     | 0.27 |
| Human insulin     | 0.16     | 0.47 | 0.28     | 0.19 | 0.07     | 0.32 |
| Insulin lispro    | 0.49     | 0.61 | 0.37     | 0.21 | 0.17     | 0.23 |
| Porcine insulin   | 0.14     | 0.17 | 0.16     | 0.51 | 0.15     | 0.26 |
