# Supplementary material for: A simple dilute and shoot methodology for the identification and quantification of illegal insulin
Source: PubMed Central journal article supplement — J Pharm Anal. 2016 Apr 22;6(5):326–34. doi: 10.1016/j.jpha.2016.04.006 (PMC5762622; doi:10.1016/j.jpha.2016.04.006), 2016-04-22
Supplement: mmc3.pdf [file mmc3.pdf]

**Table A2.** Overview of the LLOQ and LOQ of the quantification method.

|                      | LLOQ<br>( $\mu\text{g/ml}$ ) | LOQ<br>( $\mu\text{g/ml}$ ) |
|----------------------|------------------------------|-----------------------------|
| LC-MS/MS             |                              |                             |
|                      |                              | 0                           |
| Insulin<br>aspart    | 25                           |                             |
| Bovine<br>insulin    | 20                           | 50                          |
| Insulin<br>degludec  | 75                           | 100                         |
| Insulin<br>detemir   | 75                           | 100                         |
| Insulin<br>glargine  | 40                           | 50                          |
| Insulin<br>glulisine | 20                           | 50                          |
| Porcine<br>insulin   | 20                           | 50                          |
| LC-DAD               |                              |                             |
| Human<br>insulin     | 75                           | 100                         |
| Insulin<br>lispro    | 75                           | 100                         |
