# Supplementary figures and images for: A simple dilute and shoot methodology for the identification and quantification of illegal insulin
Source: PubMed Central journal article supplement — J Pharm Anal. 2016 Apr 22;6(5):326–34. doi: 10.1016/j.jpha.2016.04.006 (PMC5762622; doi:10.1016/j.jpha.2016.04.006), 2016-04-22

Supplementary Material Fig.A1

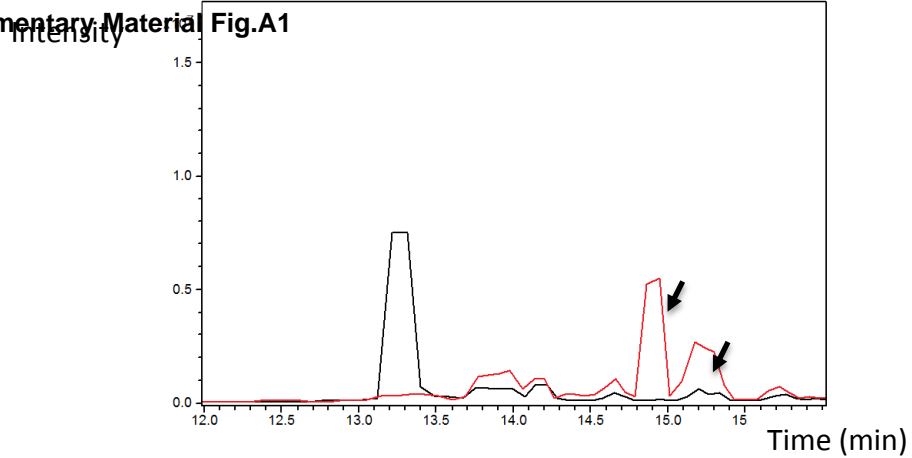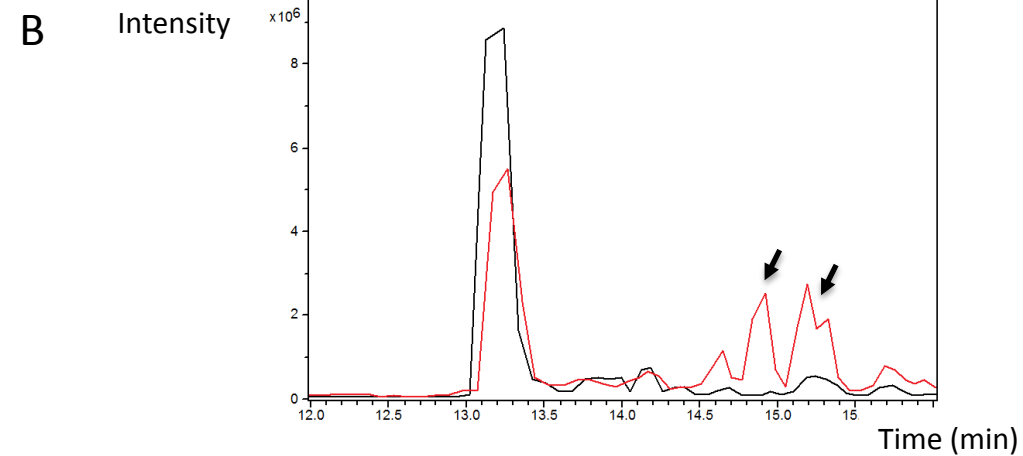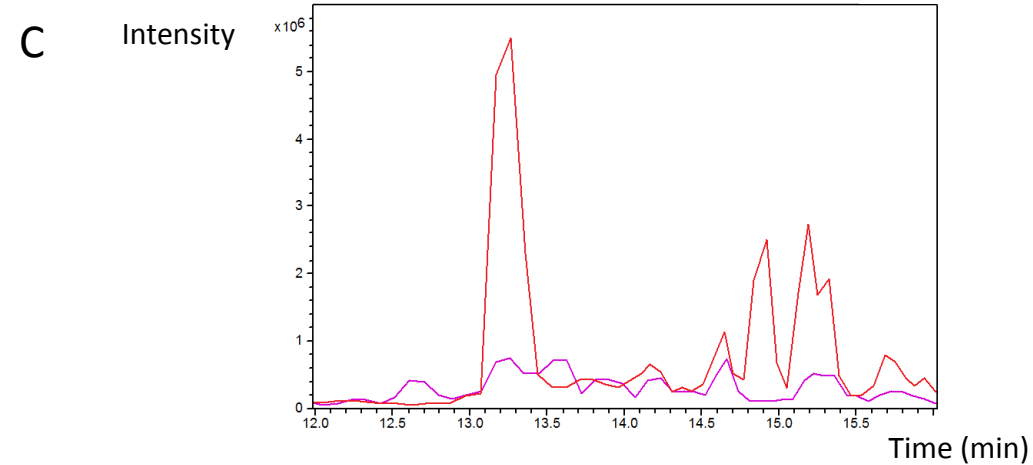

Supplement: mmc1.pdf [file mmc1.pdf]
